# Supplementary material for: Preparation of a novel hydrazine electrochemical sensor using Fe 2 O 3 @ZnO core–shell nanoparticles
Source: Royal Society of Chemistry journal article supplement (doi:10.1039/d5nr02927a), 2025-12-27

**Preparation of a novel hydrazine electrochemical sensor using Fe<sub>2</sub>O<sub>3</sub>@ZnO core-shell nanoparticles**

R. Shariati,<sup>a</sup> F. Ahour,<sup>\*a,b</sup> A. Zamani<sup>a,b</sup>

<sup>a</sup> *Department of Nanotechnology, Faculty of Chemistry, Urmia University, Urmia, Iran*

<sup>b</sup> *Nanotechnology Research Center, Urmia University, Urmia, Iran*

Corresponding author:

\* Fatemeh Ahour

E-mail: [Fatemeh.ahour@gmail.com](mailto:Fatemeh.ahour@gmail.com), [f.ahour@urmia.ac.ir](mailto:f.ahour@urmia.ac.ir); Fax: +98 44-32752746

Fig. 1S. Cyclic voltammograms of the  $\text{Fe}_2\text{O}_3@\text{ZnO}$  modified GCE prepared (a) electrochemically and (b) by the drop casting method.

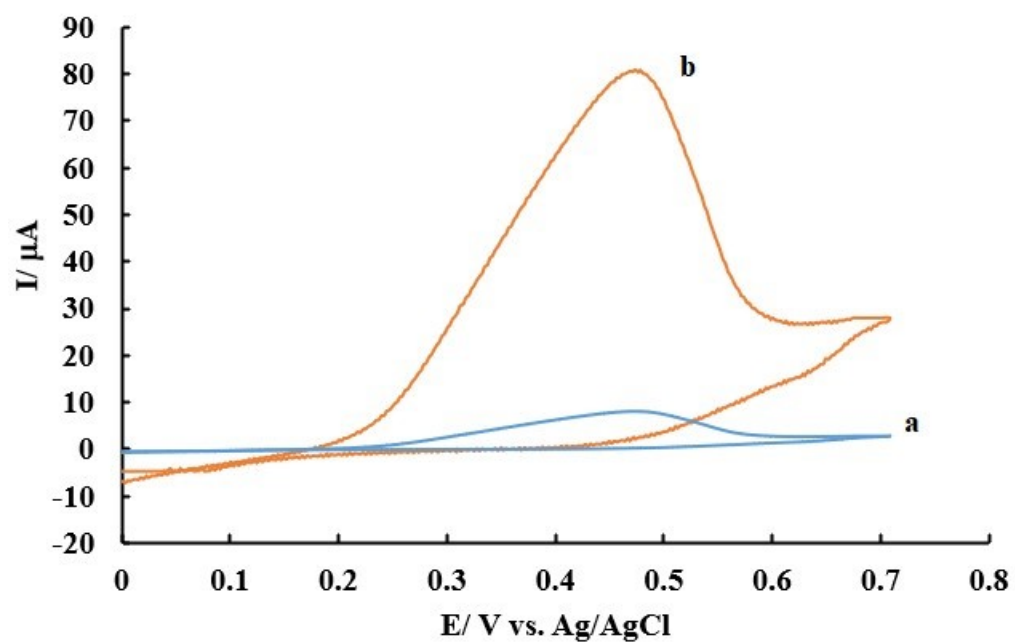

**Fig. 2S.** Variation of LSV signal of the  $\text{Fe}_2\text{O}_3@\text{ZnO}$  modified GCE prepared using different replicates of drope casting

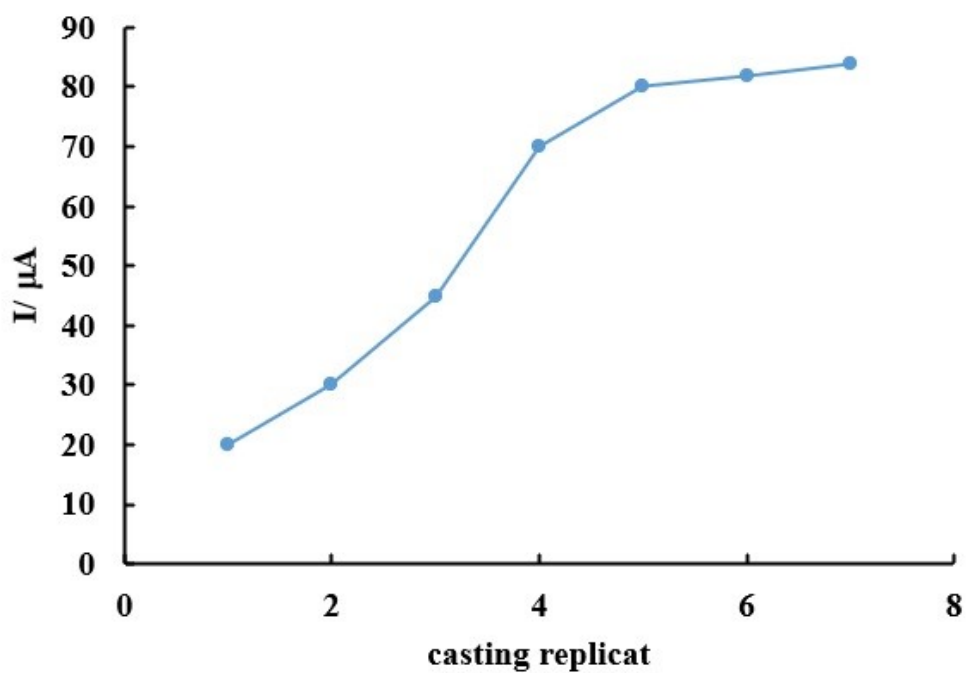

**Fig. 3S.** Consecutive linear sweep voltammetry (LSV) measurements conducted under optimized experimental conditions

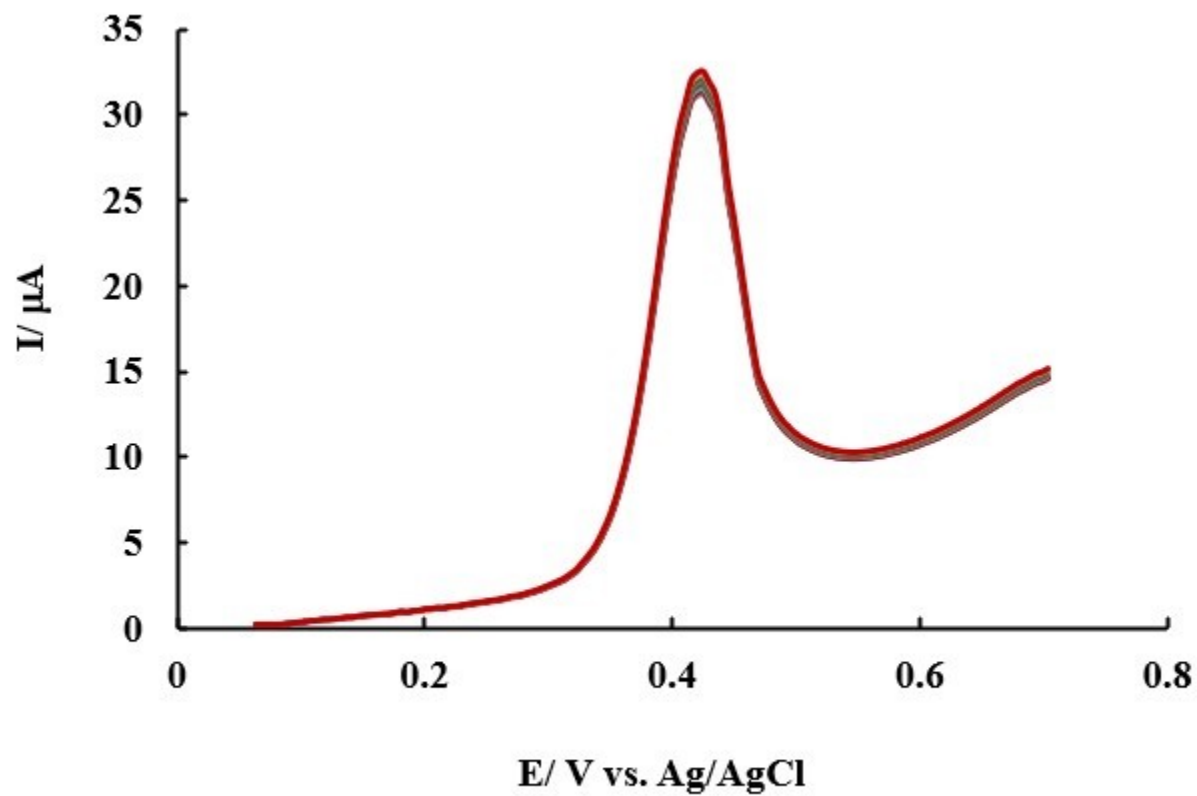

**Fig. 4S.** Histogram illustrating the repeatability of LSV responses for the proposed sensor in 30  $\mu\text{M}$  HAZ across multiple scans (dipping, potential scanning, and washing)

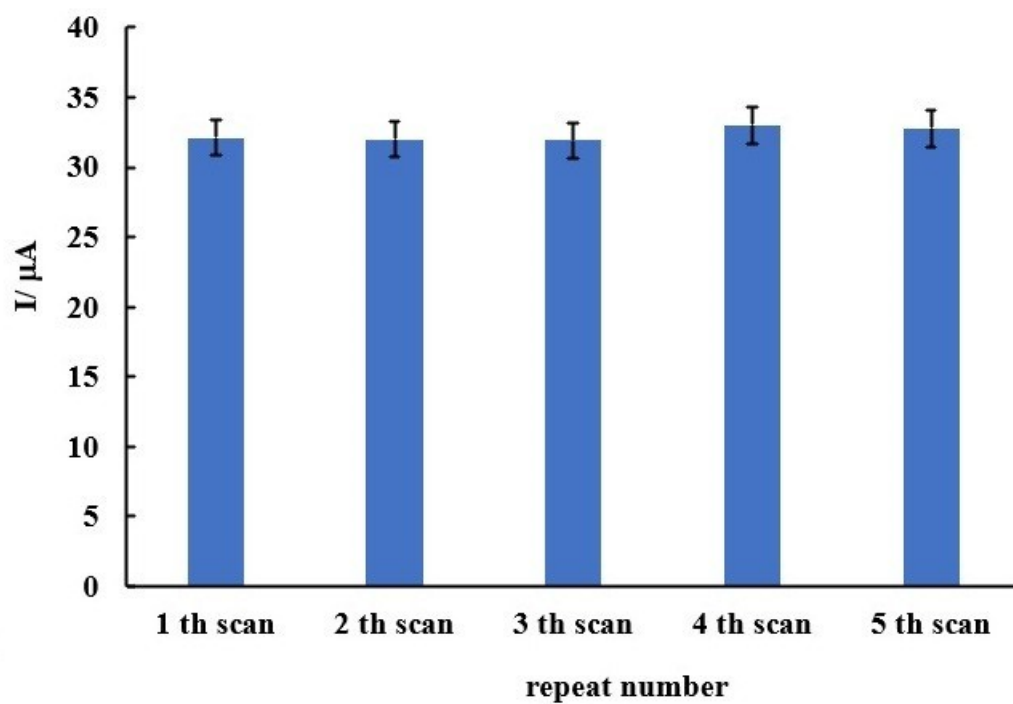

**Fig. 5S.** Histogram showing the LSV responses for 30  $\mu\text{M}$  HAZ using a newly prepared electrode and after storage for various durations

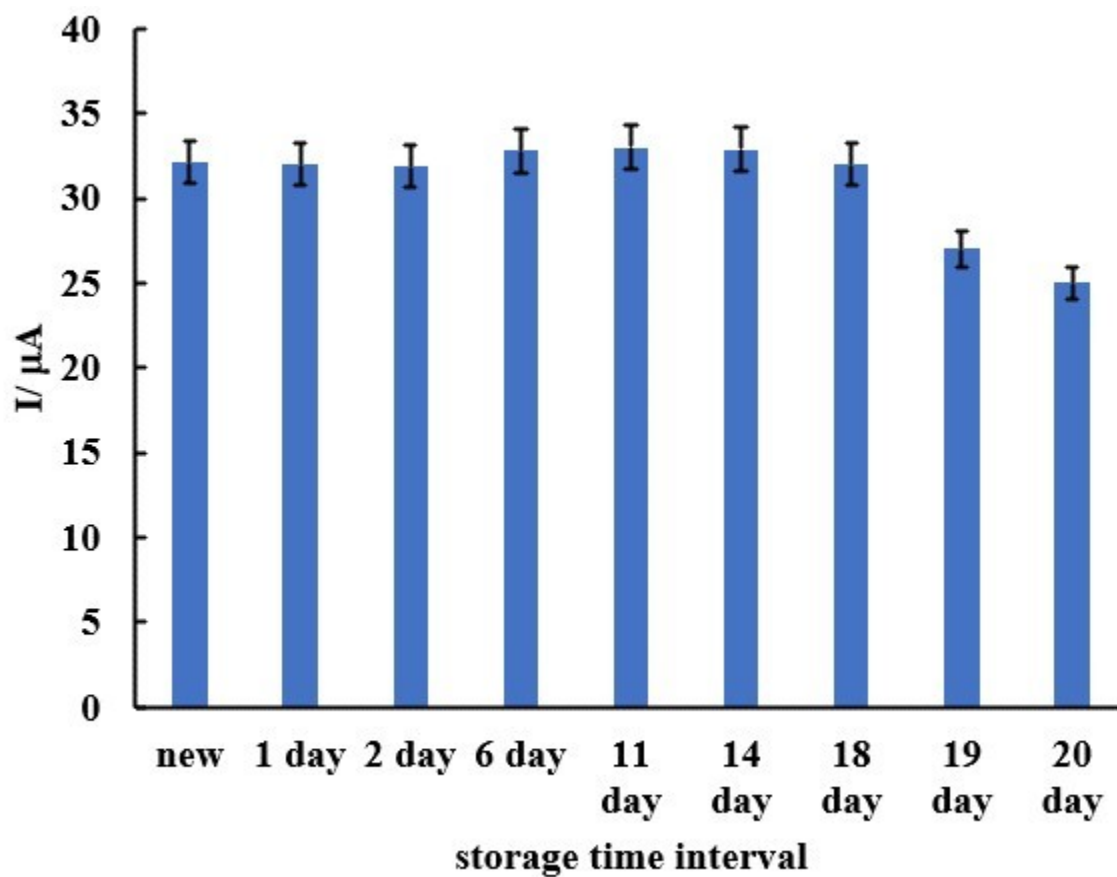

**Fig. 6S.** LSV responses obtained from five independently prepared sensors measured in 30  $\mu\text{M}$  HAZ, demonstrating sensor-to-sensor reproducibility.

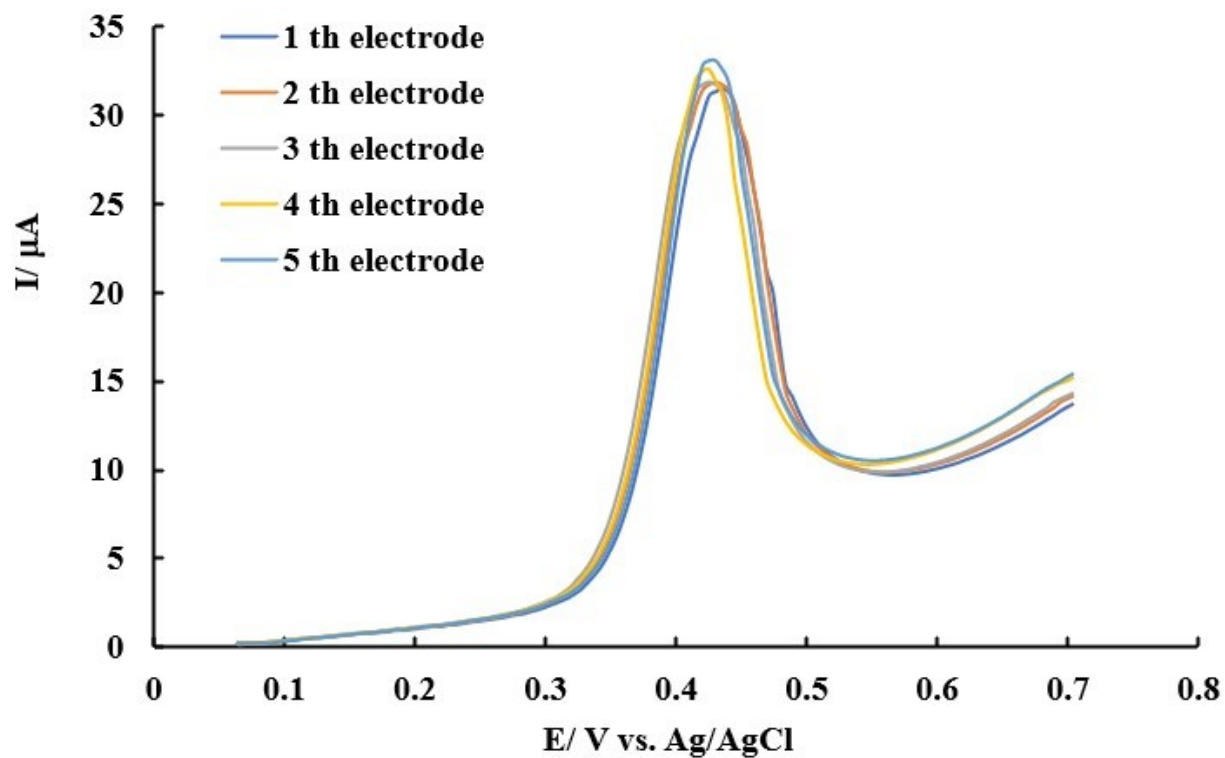

Supplement: d5nr02927a1.pdf [file d5nr02927a1.pdf]
